# Supplementary material
Source: PubMed Central journal article supplement (PMC2655228)
Supplement: NIHMS95550-supplement-1.pdf [file NIHMS95550-supplement-1.pdf]

**Table S1. Demographic characteristics of the HyperGEN African American subjects with fast time >8 hrs**

---

|                          |                 |
|--------------------------|-----------------|
| N                        | 2020            |
| Men (%)                  | 36.5            |
| Age                      | 46.10 ± 13.14   |
| BMI (kg/m <sup>2</sup> ) | 32.00 ± 7.75    |
| Met(S) (%)               | 26.75           |
| Waist Girth (cm)         | 102.26 ± 18.19  |
| Systolic BP (mmHg)       | 129.11 ± 22.09  |
| Diastolic BP (mmHg)      | 74.21 ± 11.87   |
| HDL-C (mg/dL)            | 53.51 ± 15.37   |
| Triglycerides (mg/dL)    | 108.94 ± 113.60 |
| Glucose (mg/dL)          | 95.81 ± 21.39   |

---

Data presented as Mean ± SD.

**Table S2. Association between 36 CD36 tag SNPs and MetS components other than HDL-C**

| SNP<br>ID | Hypertension |                    |             | Glucose        |             |             | Triglyceride   |             |             | Waist          |             |             |
|-----------|--------------|--------------------|-------------|----------------|-------------|-------------|----------------|-------------|-------------|----------------|-------------|-------------|
|           | OR           | 95% CI             | FDR         | <sup>a</sup> β | ±SE         | FDR         | <sup>a</sup> β | ±SE         | FDR         | <sup>a</sup> β | ±SE         | FDR         |
| 1         | 1.29         | 0.99 - 1.69        | 0.28        | 0.00           | 0.01        | 0.70        | 0.01           | 0.02        | 0.68        | 0.74           | 0.74        | 0.55        |
| 2         | 0.98         | 0.78 - 1.23        | 0.73        | 0.00           | 0.01        | 0.68        | -0.03          | 0.02        | 0.50        | 0.06           | 0.73        | 0.75        |
| 3         | 1.35         | 0.97 - 1.88        | 0.29        | -0.01          | 0.01        | 0.48        | 0.02           | 0.03        | 0.66        | 0.96           | 0.89        | 0.54        |
| 4         | 0.84         | 0.61 - 1.18        | 0.55        | -0.01          | 0.01        | 0.29        | 0.02           | 0.02        | 0.66        | 0.47           | 0.85        | 0.68        |
| 5         | 0.87         | 0.64 - 1.19        | 0.61        | -0.01          | 0.01        | 0.66        | 0.00           | 0.02        | 0.74        | -0.15          | 0.88        | 0.73        |
| 6         | 0.98         | 0.81 - 1.18        | 0.72        | 0.00           | 0.01        | 0.70        | 0.03           | 0.02        | 0.31        | 0.44           | 0.63        | 0.66        |
| 7         | 1.33         | 0.95 - 1.85        | 0.32        | 0.01           | 0.01        | 0.68        | -0.04          | 0.03        | 0.50        | 1.54           | 1.30        | 0.50        |
| <b>8</b>  | <b>0.91</b>  | <b>0.61 - 1.34</b> | <b>0.68</b> | <b>0.03</b>    | <b>0.01</b> | <b>0.22</b> | -0.02          | 0.03        | 0.66        | <b>-3.38</b>   | <b>1.30</b> | <b>0.11</b> |
| 9         | 0.85         | 0.61 - 1.17        | 0.55        | 0.01           | 0.01        | 0.55        | 0.05           | 0.03        | 0.28        | -0.56          | 0.98        | 0.68        |
| 10        | 1.59         | 0.97 - 2.63        | 0.28        | 0.01           | 0.02        | 0.66        | -0.04          | 0.04        | 0.55        | 2.93           | 1.55        | 0.28        |
| <b>11</b> | <b>0.61</b>  | <b>0.38 - 0.98</b> | <b>0.26</b> | 0.00           | 0.01        | 0.73        | -0.05          | 0.04        | 0.46        | -0.55          | 1.47        | 0.70        |
| 12        | 0.77         | 0.57 - 1.04        | 0.31        | 0.00           | 0.01        | 0.68        | -0.03          | 0.02        | 0.50        | -1.24          | 0.77        | 0.36        |
| 13        | 1.19         | 0.94 - 1.52        | 0.43        | 0.00           | 0.01        | 0.66        | 0.01           | 0.02        | 0.70        | -0.54          | 0.79        | 0.66        |
| 14        | 0.96         | 0.77 - 1.19        | 0.70        | 0.01           | 0.01        | 0.50        | -0.01          | 0.02        | 0.68        | -0.91          | 0.73        | 0.50        |
| 15        | 1.05         | 0.86 - 1.28        | 0.68        | 0.00           | 0.01        | 0.66        | -0.01          | 0.02        | 0.70        | 0.27           | 0.64        | 0.69        |
| 16        | 0.84         | 0.70 - 1.01        | 0.28        | 0.00           | 0.01        | 0.72        | 0.02           | 0.02        | 0.54        | -0.81          | 0.60        | 0.46        |
| 17        | 0.88         | 0.61 - 1.27        | 0.66        | 0.01           | 0.01        | 0.66        | 0.04           | 0.04        | 0.55        | -1.26          | 1.25        | 0.55        |
| <b>18</b> | <b>1.00</b>  | <b>0.81 - 1.22</b> | <b>0.76</b> | <b>-0.01</b>   | <b>0.01</b> | <b>0.26</b> | 0.02           | 0.02        | 0.53        | -0.17          | 0.69        | 0.72        |
| 19        | 0.93         | 0.73 - 1.17        | 0.66        | -0.01          | 0.01        | 0.38        | -0.01          | 0.02        | 0.70        | 1.18           | 0.75        | 0.38        |
| 20        | 0.99         | 0.73 - 1.35        | 0.76        | -0.01          | 0.01        | 0.29        | 0.01           | 0.03        | 0.71        | 0.40           | 0.85        | 0.68        |
| 21        | 1.00         | 0.82 - 1.23        | 0.76        | 0.00           | 0.01        | 0.70        | 0.00           | 0.02        | 0.72        | 0.29           | 0.65        | 0.68        |
| 22        | 0.87         | 0.72 - 1.05        | 0.44        | 0.00           | 0.01        | 0.70        | 0.00           | 0.02        | 0.73        | -0.97          | 0.62        | 0.38        |
| 23        | 1.01         | 0.74 - 1.36        | 0.76        | 0.00           | 0.01        | 0.68        | 0.00           | 0.02        | 0.77        | -0.46          | 0.83        | 0.68        |
| 24        | 1.05         | 0.79 - 1.40        | 0.70        | 0.01           | 0.01        | 0.66        | 0.01           | 0.03        | 0.72        | -1.04          | 0.94        | 0.53        |
| 25        | 0.86         | 0.56 - 1.32        | 0.66        | 0.01           | 0.02        | 0.55        | 0.01           | 0.04        | 0.70        | -1.42          | 1.40        | 0.55        |
| 26        | 0.81         | 0.63 - 1.03        | 0.32        | 0.01           | 0.01        | 0.54        | -0.02          | 0.02        | 0.55        | -0.60          | 0.82        | 0.66        |
| 27        | 1.30         | 0.88 - 1.91        | 0.46        | 0.00           | 0.01        | 0.72        | 0.00           | 0.04        | 0.77        | 1.04           | 1.72        | 0.66        |
| <b>28</b> | <b>0.70</b>  | <b>0.55 - 0.89</b> | <b>0.06</b> | 0.00           | 0.01        | 0.73        | -0.01          | 0.02        | 0.71        | -0.27          | 0.81        | 0.70        |
| 29        | 0.87         | 0.72 - 1.06        | 0.46        | 0.00           | 0.01        | 0.71        | 0.00           | 0.02        | 0.72        | -0.03          | 0.65        | 0.76        |
| 30        | 1.25         | 0.86 - 1.81        | 0.50        | 0.00           | 0.01        | 0.70        | 0.00           | 0.04        | 0.76        | 0.24           | 1.54        | 0.73        |
| 31        | 0.95         | 0.76 - 1.19        | 0.68        | 0.00           | 0.01        | 0.68        | 0.01           | 0.02        | 0.68        | -0.11          | 0.72        | 0.73        |
| <b>32</b> | <b>0.63</b>  | <b>0.45 - 0.90</b> | <b>0.12</b> | -0.01          | 0.01        | 0.66        | <b>-0.08</b>   | <b>0.03</b> | <b>0.09</b> | 1.04           | 1.14        | 0.58        |
| 33        | 1.06         | 0.74 - 1.53        | 0.70        | -0.01          | 0.01        | 0.66        | 0.01           | 0.03        | 0.70        | -0.75          | 1.22        | 0.66        |
| 34        | 1.04         | 0.74 - 1.45        | 0.72        | 0.01           | 0.01        | 0.63        | 0.04           | 0.03        | 0.46        | -0.81          | 0.80        | 0.55        |
| 35        | 1.02         | 0.80 - 1.30        | 0.74        | 0.00           | 0.01        | 0.66        | 0.01           | 0.02        | 0.66        | -0.62          | 0.76        | 0.63        |
| 36        | 1.04         | 0.80 - 1.37        | 0.70        | 0.01           | 0.01        | 0.51        | 0.02           | 0.03        | 0.66        | -0.93          | 0.79        | 0.50        |

SNP ID corresponds to Table 1. <sup>a</sup>Resulting parameter estimate from additive regression analysis. Glucose, triglyceride, and waist circumference were log transformed. Bolded text highlight SNPs with p <sup>2</sup>0.05 (also see Figure 1). SE=standard error. See Table 3 for HDL-C associations.

**Table S3. Resulting p-values for BMI vs Waist Circumference (WC) adjusted analysis.**

| SNP       | MetS                       |                           | HDL                        |                           |
|-----------|----------------------------|---------------------------|----------------------------|---------------------------|
|           | BMI<br>adjusted<br>p-value | WC<br>adjusted<br>p-value | BMI<br>adjusted<br>p-value | WC<br>adjusted<br>p-value |
| <b>32</b> | 0.0012                     | 0.0015                    | 0.0002                     | 0.00003                   |
| <b>36</b> | 0.0027                     | 0.0028                    | 0.3449                     | 0.2165                    |
| <b>35</b> | 0.0037                     | 0.0033                    | 0.0380                     | 0.0222                    |
| <b>31</b> | 0.0049                     | 0.0049                    | 0.0596                     | 0.0350                    |
| <b>34</b> | 0.0107                     | 0.0069                    | 0.1283                     | 0.0846                    |
| <b>17</b> | 0.0304                     | 0.0251                    | 0.1194                     | 0.0516                    |
| <b>9</b>  | 0.0538                     | 0.0495                    | 0.0438                     | 0.0403                    |
| 2         | 0.0552                     | 0.0784                    | 0.9311                     | 0.9174                    |
| 7         | 0.1170                     | 0.0457                    | 0.1224                     | 0.0852                    |
| <b>29</b> | 0.1208                     | 0.1233                    | 0.0395                     | 0.0128                    |
| <b>16</b> | 0.1353                     | 0.0992                    | 0.0288                     | 0.0666                    |
| 10        | 0.1416                     | 0.0434                    | 0.2474                     | 0.1781                    |
| <b>6</b>  | 0.1816                     | 0.1987                    | 0.0028                     | 0.0054                    |
| <b>18</b> | 0.2483                     | 0.2268                    | 0.0030                     | 0.0125                    |
| <b>4</b>  | 0.3443                     | 0.2913                    | 0.0148                     | 0.0226                    |
| <b>28</b> | 0.3538                     | 0.4574                    | 0.0220                     | 0.0085                    |
| 5         | 0.3921                     | 0.4880                    | 0.3771                     | 0.4427                    |
| 33        | 0.4047                     | 0.3472                    | 0.6176                     | 0.5351                    |
| <b>21</b> | 0.4330                     | 0.3009                    | 0.0079                     | 0.0053                    |
| 11        | 0.4850                     | 0.5834                    | 0.0646                     | 0.0507                    |
| 27        | 0.5147                     | 0.5188                    | 0.4985                     | 0.4215                    |
| <b>1</b>  | 0.5816                     | 0.4330                    | 0.0003                     | 0.0005                    |
| 8         | 0.5950                     | 0.5376                    | 0.1362                     | 0.1473                    |
| 26        | 0.6179                     | 0.7116                    | 0.6353                     | 0.9900                    |
| 14        | 0.7493                     | 0.7842                    | 0.1948                     | 0.3092                    |
| 23        | 0.7924                     | 0.9180                    | 0.0822                     | 0.0949                    |
| 13        | 0.8560                     | 0.8560                    | 0.0611                     | 0.0705                    |
| <b>22</b> | 0.8631                     | 0.9567                    | 0.0007                     | 0.0011                    |
| <b>19</b> | 0.8638                     | 0.8832                    | 0.0327                     | 0.0424                    |
| <b>3</b>  | 0.9168                     | 0.7487                    | 0.0038                     | 0.0039                    |
| <b>15</b> | 0.9266                     | 0.9551                    | 0.0007                     | 0.0005                    |
| 12        | 0.9328                     | 0.7366                    | 0.1971                     | 0.1391                    |
| 30        | 0.9419                     | 0.9768                    | 0.6096                     | 0.6177                    |
| <b>20</b> | 0.9603                     | 0.9127                    | 0.0112                     | 0.0158                    |
| 25        | 0.9664                     | 0.8355                    | 0.5929                     | 0.4268                    |
| 24        | 0.9867                     | 0.9971                    | 0.2393                     | 0.2307                    |

The same SNPs (bolded) were identified whether analysis was adjusted for waist circumference or BMI.
